# Supplementary material
Source: publisher figshare collection journal article supplement (https://acs.figshare.com/ndownloader/files/3707023)
Supplement: Supplementary file 1 [file 3707023]

## **Online Supporting Figures and Tables for**

### **Universal Solid-phase Reversible Sample-Prep for Concurrent Proteome and N-glycome Characterization**

Hui Zhou, Samantha Morley, Stephen Kostel, Michael R. Freeman, Vivek Joshi, David Brewster, Richard S. Lee

Correspondence should be addressed to:

Richard S. Lee, MD  
Boston Children's Hospital  
Department of Urology  
300 Longwood Avenue  
Hunnewell 390  
Boston, MA 02115  
[Richard.Lee@childrens.harvard.edu](mailto:Richard.Lee@childrens.harvard.edu)  
617-355-3348 (Phone)  
617-730-0474 (fax)

- Supporting Figure 1: Comparison of MALDI-MS of permethylated N-glycans of bovine fetuin by different Sample-Prep Strategies.
- Supporting Figure 2: Comparison of MALDI-MS of permethylated N-glycans of human serum IgG by different Sample-Prep Strategies.
- Supporting Figure 3: Comparison of MALDI-MS of permethylated N-glycans from two different murine kidneys.
- Supporting Figure 4: Comparison of MALDI-MS of permethylated N-glycans from two different murine bladders.
- Supporting Figure 5: MALDI-MS of permethylated N-glycans from human urine specimen.
- Supporting Figure 6: Replicate LC-MS/MS total ion chromatographs (TIC) of fetuin tryptic peptides obtained using the SRS method.
- Supporting Figure 7: Proteomic and glycoproteomic comparison of technical or biologic replicates of various biologic samples processed by SRS.
- Supporting Figure 8: Comparison of MALDI-MS of permethylated N-glycans from DU145Ctrl and DU145KD.
- Supporting Table 1: The identified N-glycans from two different murine kidneys processed and analyzed using SRS and MALDI-MS.
- Supporting Table 2: The identified N-glycans from two different murine bladder tissue samples processed and analyzed using SRS and MALDI-MS.
- Supporting Table 3: Protein and tryptic peptide yield from the SRS platform for various biologic samples.
- Supporting Table 4: The tryptic peptides identified from SRS-bound bovine fetuin using LC-MS/MS.
- Supporting Table 5: Proteomic and glycoproteomics results for different biological samples processed using SRS.
- Supporting Table 6: N-glycans identified from DU145Ctrl and DU145KD cell lines processed and analyzed using SRS and MALDI-MS.

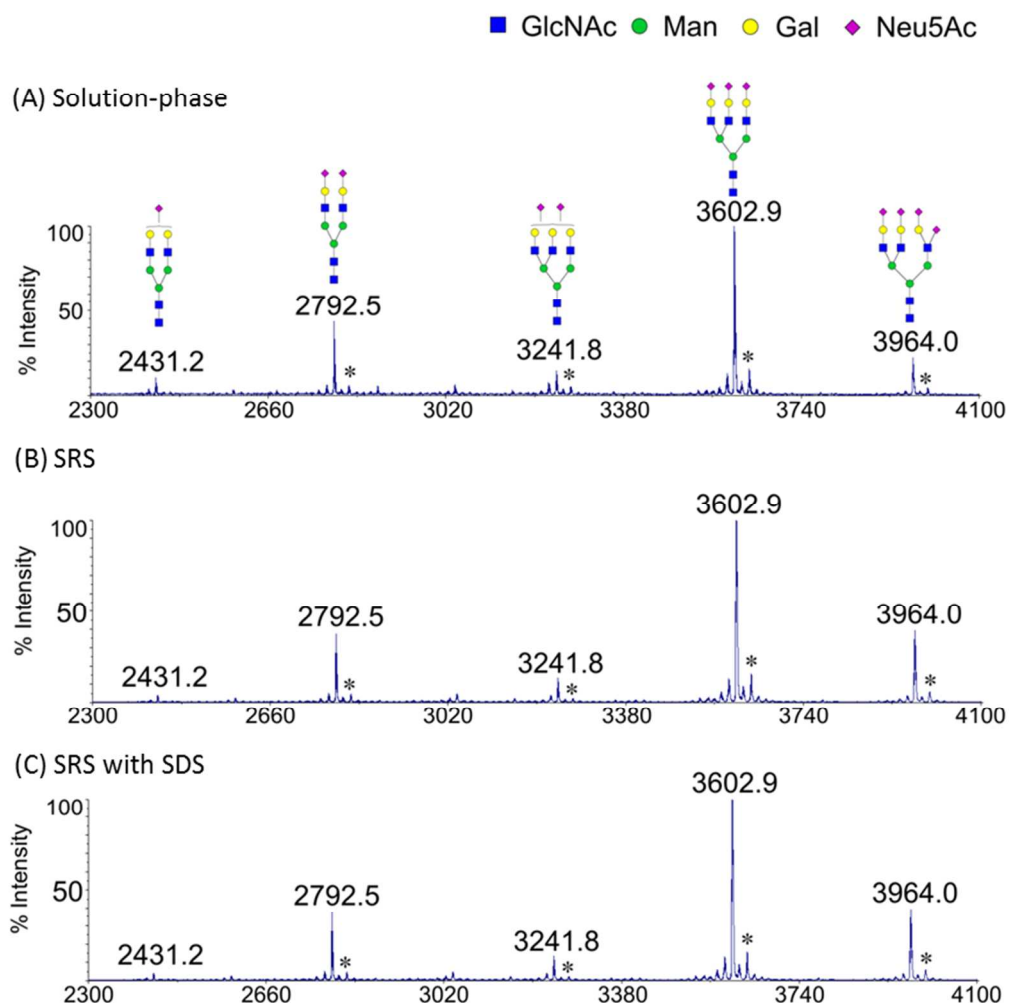

**Supporting Figure 1** | Comparison of MALDI-MS spectra of permethylated N-glycans of bovine fetuin by different Sample-Prep strategies: classic solution-phase strategy **(A)**, SRS **(B)**, and SRS with fetuin dissolved in 2% SDS /PBS **(C)**. Asterisks peaks indicate that these glycans contain one or two N-glycolylneuraminic acid (Neu5Gc) residues, rather than abundant N-acetylneuraminic acid (Neu5Ac). All peaks were single sodium adducts, and the monoisotopic peaks are annotated. All peaks were assigned a putative topology based on their  $m/z$  values and N-glycosylation biosynthetic pathway. Further structural details, such as inter-residue linkage, anomericity, and branching pattern, were not determined.

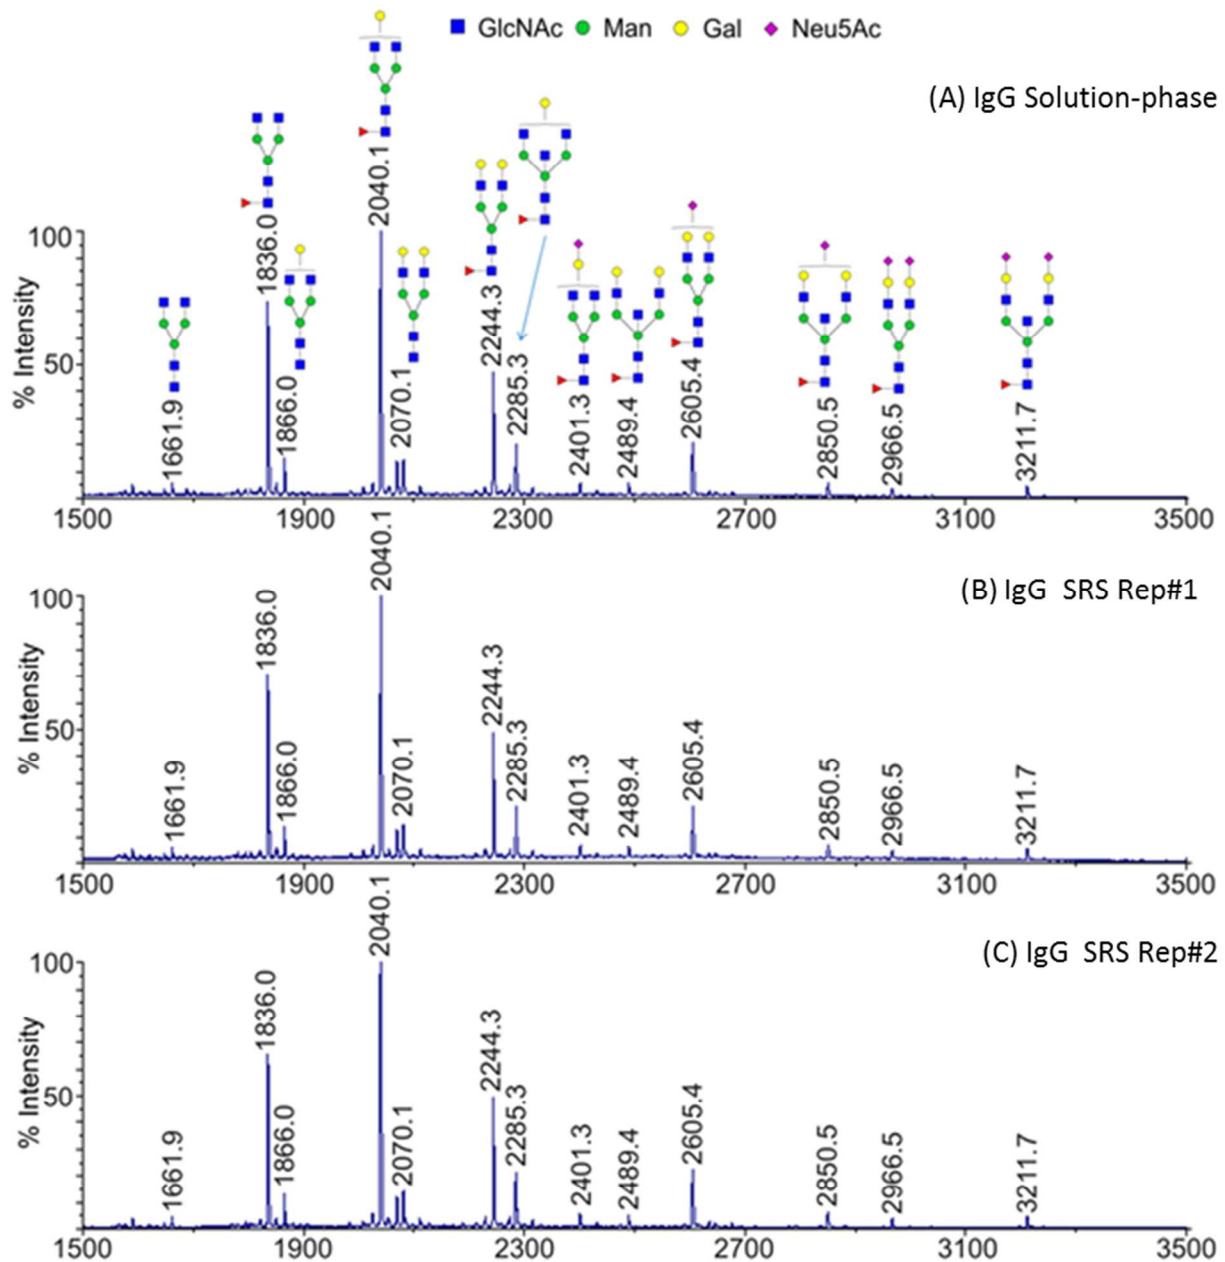

**Supporting Figure 2** | Comparison of MALDI-MS spectra of N-glycans released from human serum IgG by different Sample-Prep strategies: Solution-phase **(A)**; SRS (**Replicate #1**) **(B)**; and SRS (**Replicate #2**) **(C)**. The three spectra were highly similar to each other, indicating the SRS strategy was comparable to the classical solution phase strategy. All peaks were single sodium adducts, and the monoisotopic peaks are annotated. All peaks were assigned a putative topology based on their  $m/z$  values and N-glycosylation biosynthetic pathway. Further structural details, such as inter-residue linkage, anomericity, and branching pattern, were not determined.

(A) SRS\_kidney#1 Low-mass

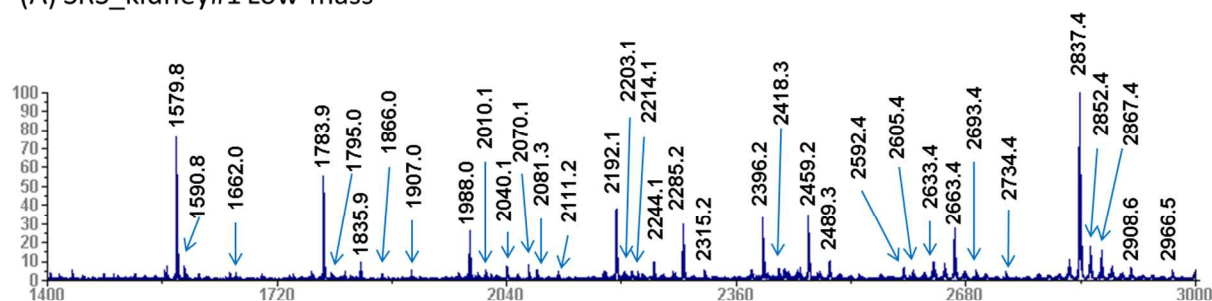

(B) SRS\_kidney#2 Low-mass

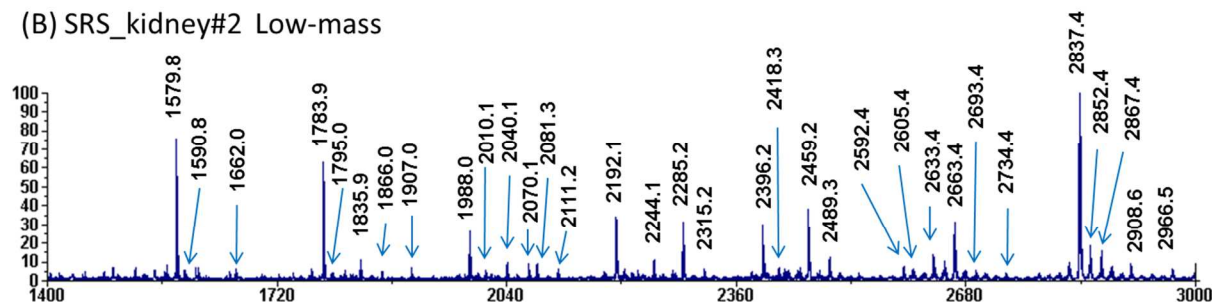

(C) SRS\_kidney#1 High-mass

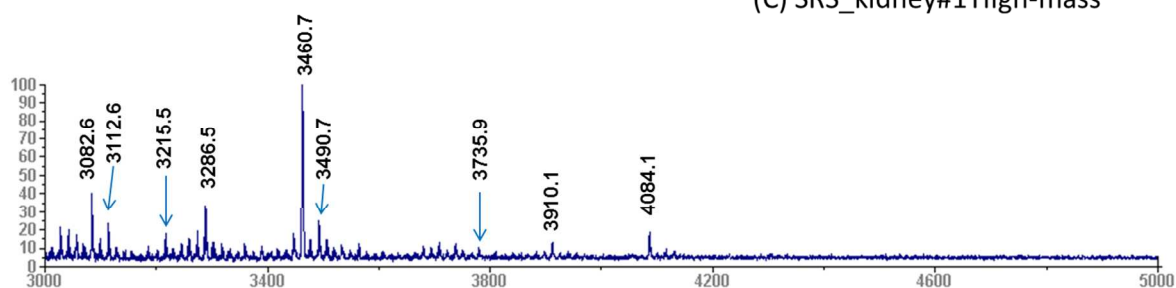

(D) SRS\_kidney#2 High-mass

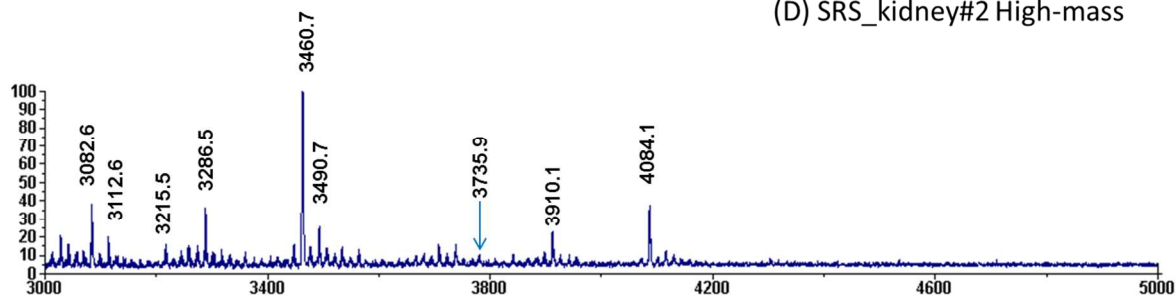

**Supporting Figure 3:** A comparison of the N-Glycome from two different murine kidneys (Kidney #1 vs. Kidney #2) processed and analyzed using SRS and MALDI-MS. All peaks were single sodium adducts, and the monoisotopic peaks were annotated. All peaks were assigned a putative topology based on their  $m/z$  values and N-glycosylation biosynthetic pathway as listed in **Supporting Table 1**.

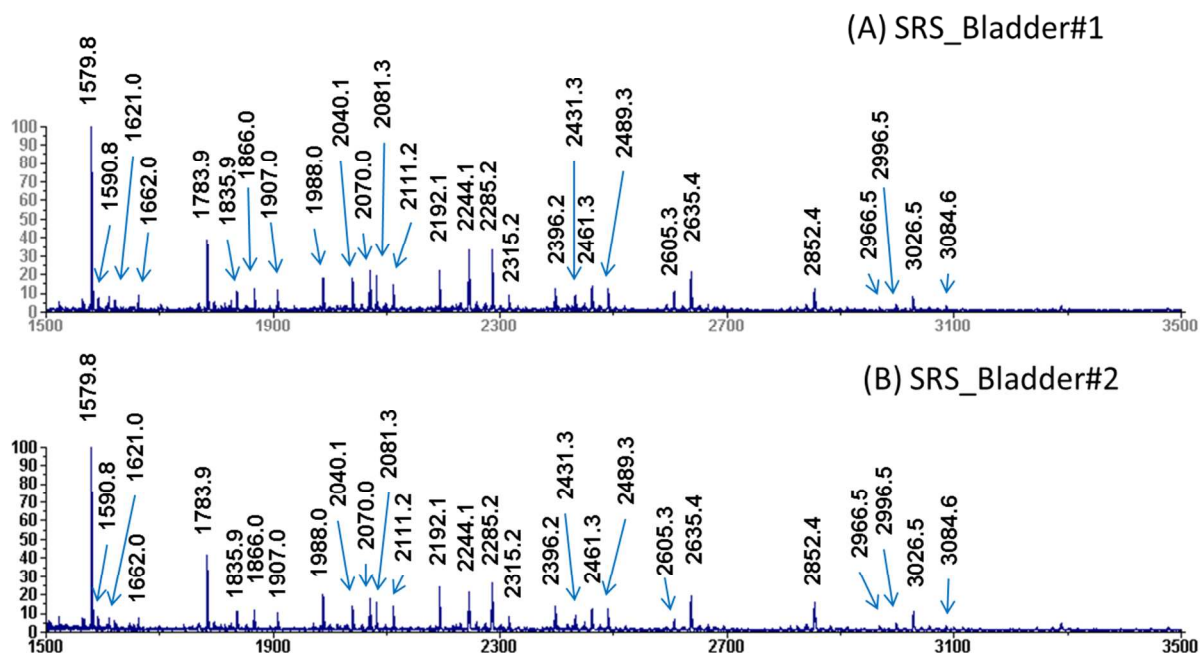

**Supporting Figure 4:** A comparison of the N-glycome from two different murine bladder tissue samples processed and analyzed using SRS and MALDI-MS (**Bladder #1 vs. Bladder #2**). All peaks were single sodium adducts, and the monoisotopic peaks were annotated. All peaks were assigned a putative topology based on their  $m/z$  values and N-glycosylation biosynthetic pathway as listed in **Supporting Table 2**.

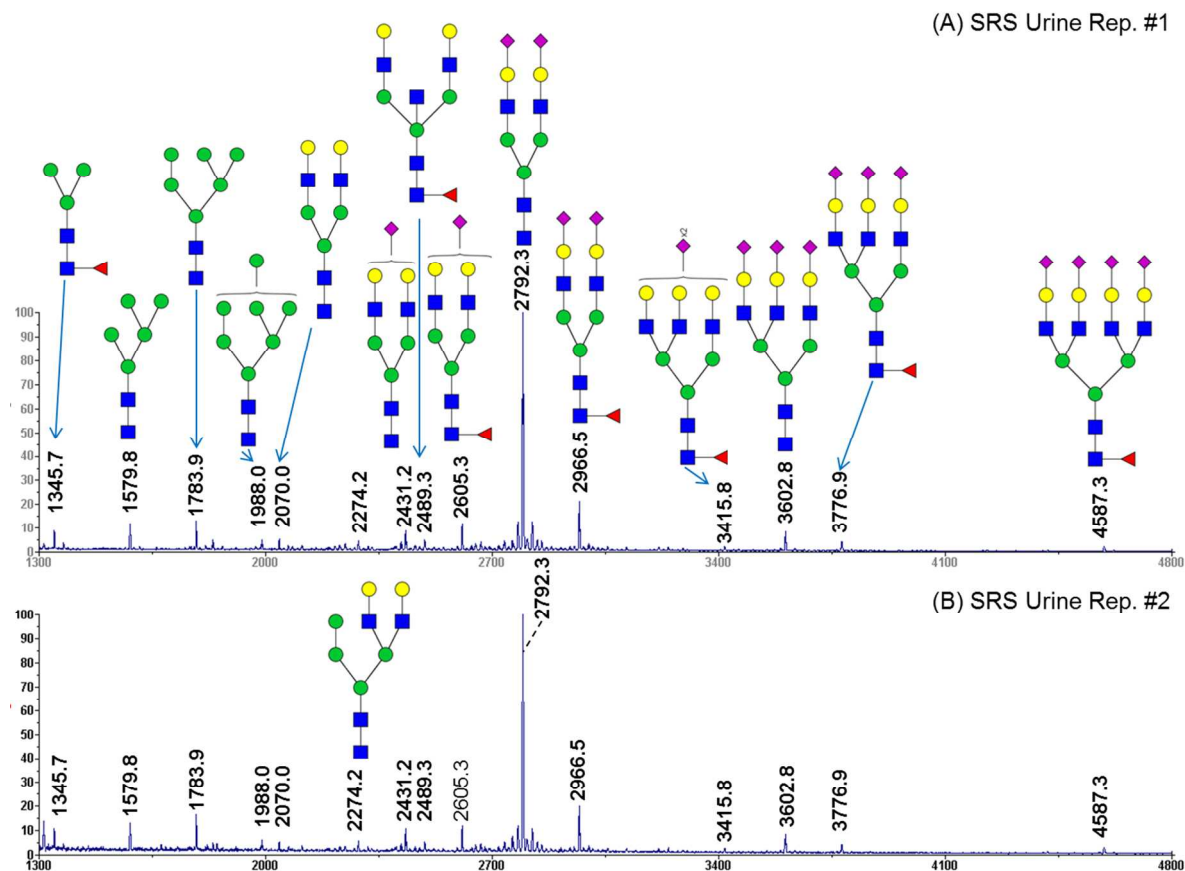

**Supporting Figure 5:** A comparison of a technical replicate (Rep#1, Rep#2) of the human urinary glycome obtained from a single urine sample processed and analyzed by SRS and MALDI-MS. Similar profiles were obtained for both replicates, indicating a high degree of reproducibility using the SRS approach. All peaks were single sodium adducts, and the monoisotopic peaks are annotated. The peaks were assigned a putative topology based on their  $m/z$  values and N-glycosylation biosynthetic pathway. Further structural details, such as inter-residue linkage, anomericity, and branching pattern, were not determined. [ ■ N-acetylglucosamine; ● mannose; ● galactose; ▲ fucose; ◆ N-acetylneuraminic acid (Neu5Ac).]

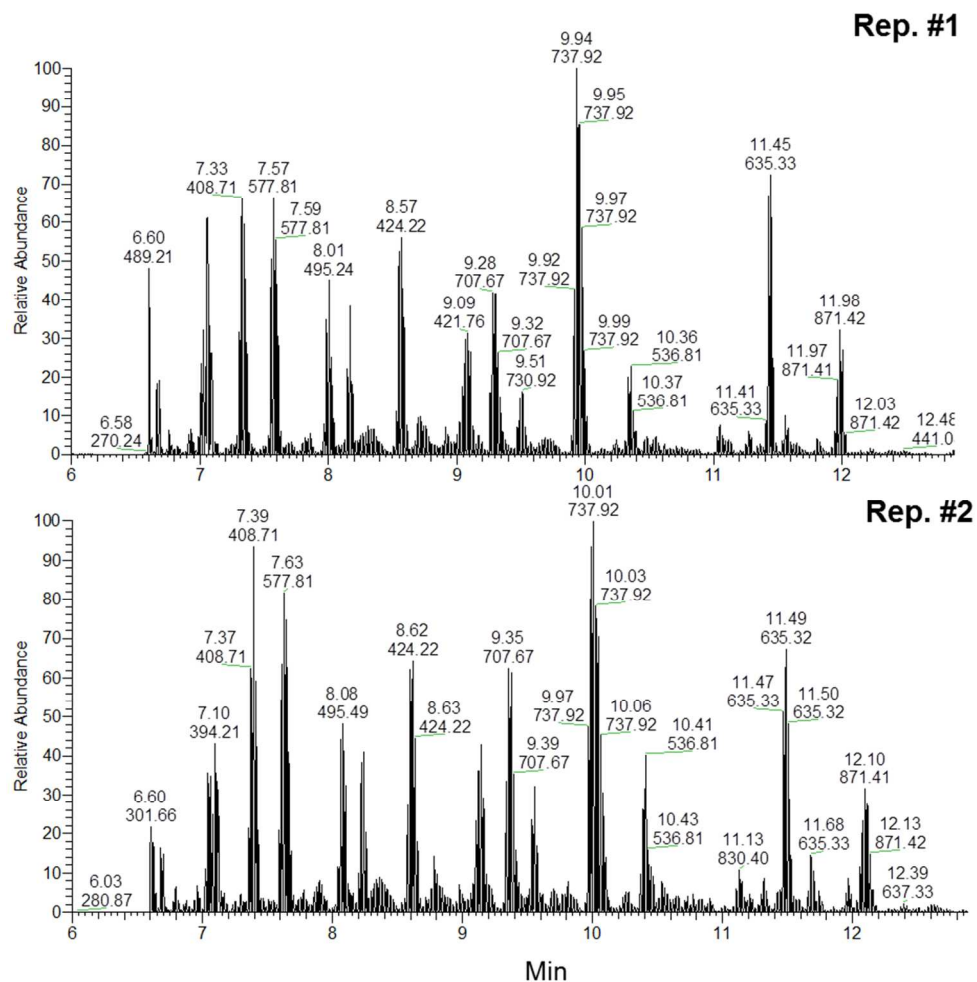

**Supporting Figure 6:** Replicate LC-MS/MS total ion chromatographs (TIC) of fetuin tryptic peptides obtained using the SRS strategy (**Rep #1, Rep #2**). The identified tryptic peptides are listed in **Supporting Table 5**. The TIC spectra were nearly identical between both replicates, suggesting that SRS is highly reproducible.



### A) DU145Ctrl

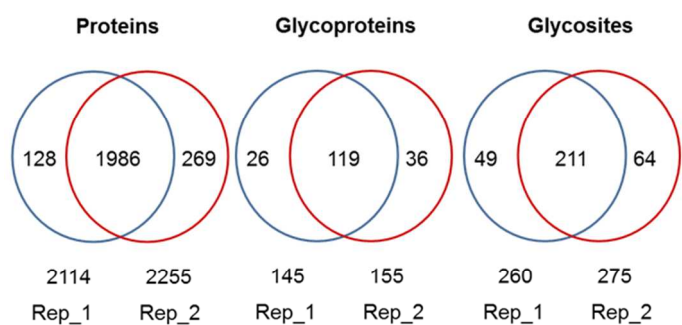

### B) DU145KD

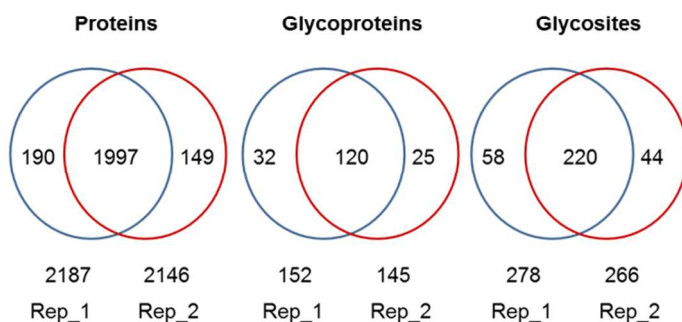

### C) Mouse colon

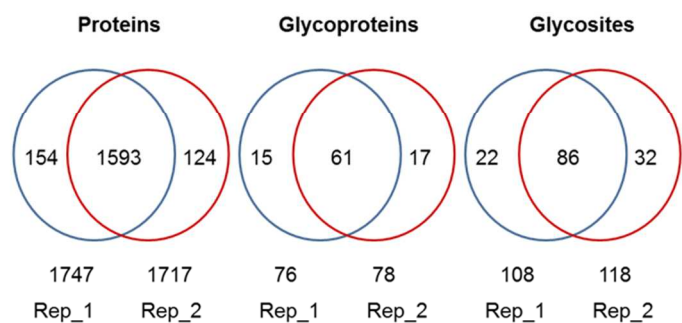

### D) Adult urine specimen

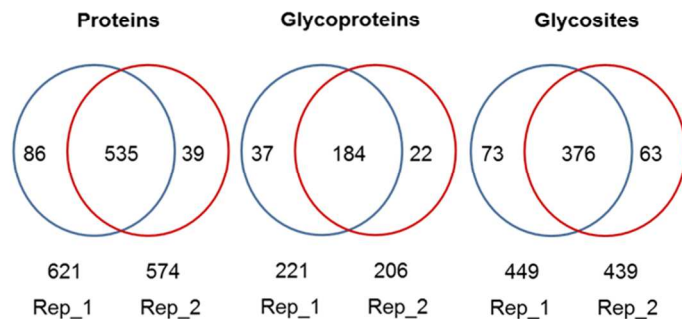

**Supporting Figure 7:** Proteomic and glycoproteomic comparison of technical or biologic replicates of various biologic samples processed by SRS. Venn-Diagrams represent the following: **A)** technical replicates of DU145Ctrl, membrane-enriched; **B)** technical replicates of

DU145KD, membrane-enriched; C) Biological replicate of murine colon; and D) technical replicate of one adult urine specimen.

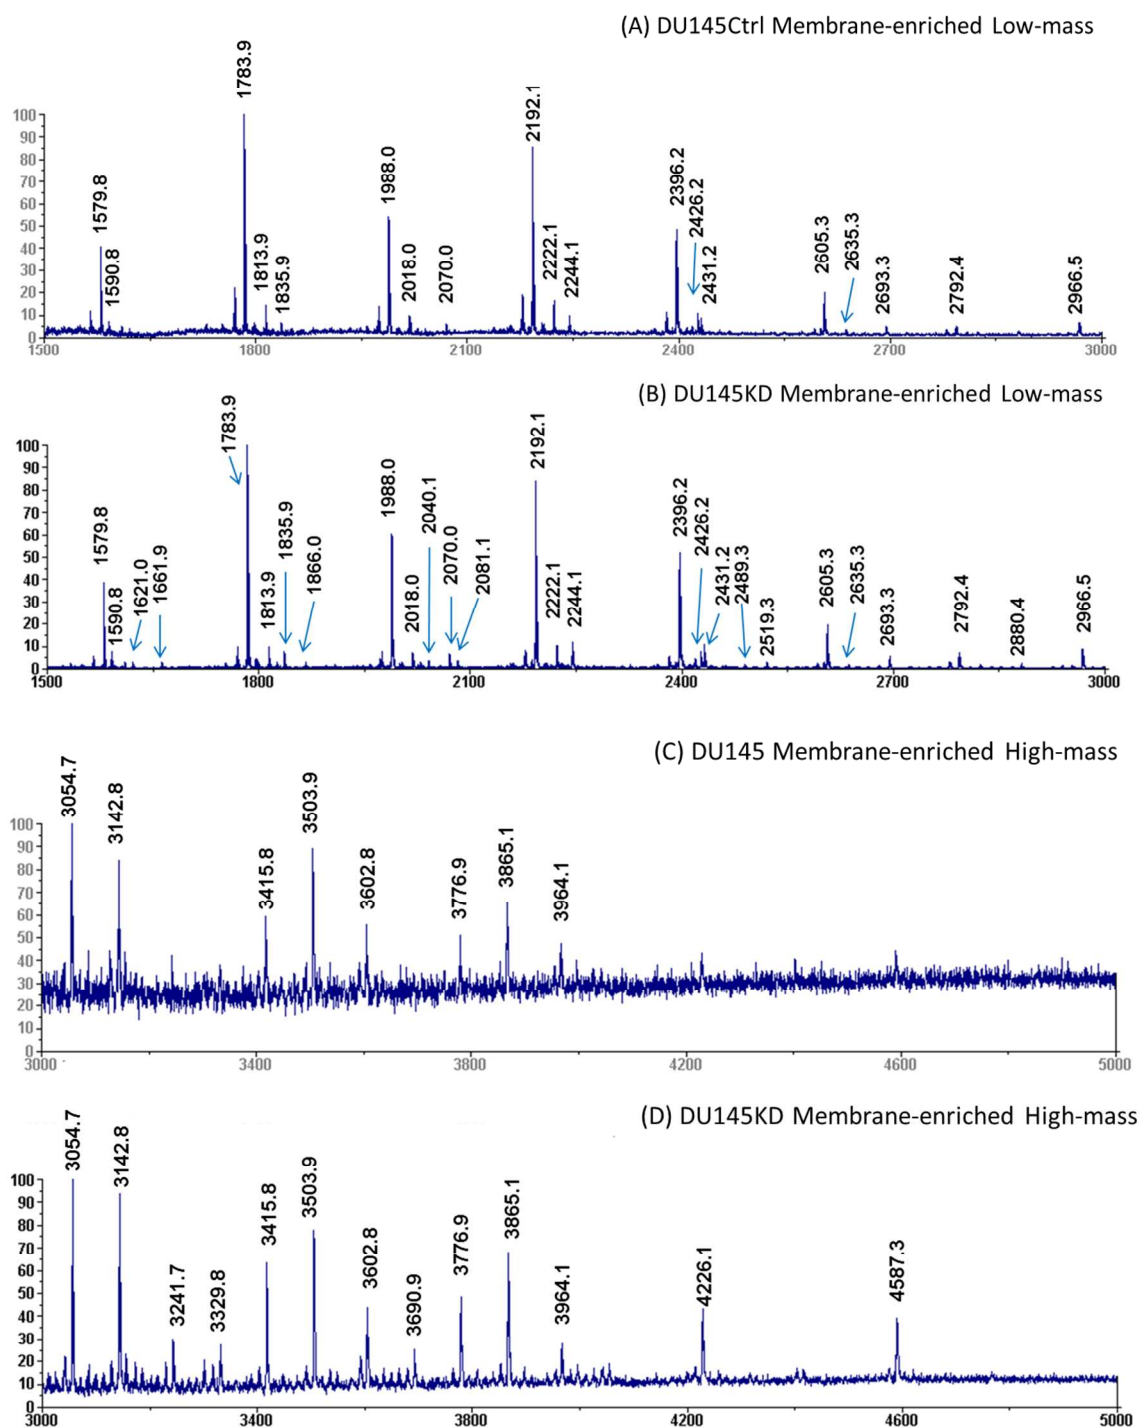

**Supporting Figure 8:** A comparison of the MALDI-MS spectra of permethylated N-glycans from DU145Ctrl and DU145KD cell lines obtained using SRS. All peaks were single sodium adducts, and the monoisotopic peaks were annotated. The identified peaks are listed in the **Supporting Table 7**.

**Supporting Table 1:** The identified N-glycans from two different murine kidneys processed and analyzed using SRS and MALDI-MS. All peaks were assigned a putative topology based on their *m/z* values and N-glycosylation biosynthetic pathway. Further structural details, such as inter-residue linkage, anomericity, and branching pattern, were not determined. (■ N-acetyl glucosamine; ● mannose; ● galactose; ▲ fucose; ◆ N-acetylneuraminic acid (Neu5Ac); ◇ N-Glycolylneuraminic acid (Neu5Gc))

| Glycan # | Observed <i>m/z</i> | Putative Topology                                                                   |
|----------|---------------------|-------------------------------------------------------------------------------------|
| 1        | 1579.8              | 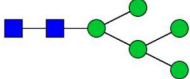   |
| 2        | 1590.8              |    |
| 3        | 1662.0              |   |
| 4        | 1783.9              |  |
| 5        | 1795.0              |  |
| 6        | 1835.9              |  |

|    |        |                                                                                     |
|----|--------|-------------------------------------------------------------------------------------|
| 7  | 1866.0 | 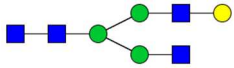   |
| 8  | 1907.0 |    |
| 9  | 1988.0 |    |
| 10 | 2010.1 |   |
| 11 | 2040.1 |  |
| 12 | 2070.0 |  |
| 13 | 2081.3 |  |

|    |        |                                                                                     |
|----|--------|-------------------------------------------------------------------------------------|
| 14 | 2111.2 | 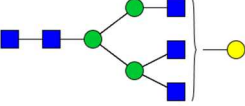   |
| 15 | 2192.1 |    |
| 16 | 2203.1 |    |
| 17 | 2214.1 |   |
| 18 | 2244.1 |  |
| 19 | 2285.2 |  |
| 20 | 2315.2 |  |

|    |        |                                                                                     |
|----|--------|-------------------------------------------------------------------------------------|
| 21 | 2396.2 | 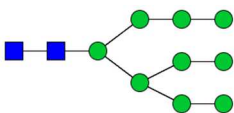   |
| 22 | 2418.3 |    |
| 23 | 2459.2 |    |
| 24 | 2489.3 |   |
| 25 | 2592.4 |  |
| 26 | 2605.3 |  |

|    |        |                                                                                     |
|----|--------|-------------------------------------------------------------------------------------|
| 27 | 2633.4 | 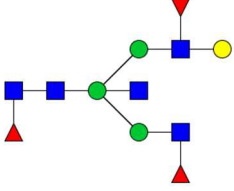   |
| 28 | 2663.4 |    |
| 29 | 2693.4 |    |
| 30 | 2734.4 |   |
| 31 | 2837.4 |  |
| 32 | 2852.4 |  |



|    |        |                                                                                     |
|----|--------|-------------------------------------------------------------------------------------|
| 33 | 2867.4 | 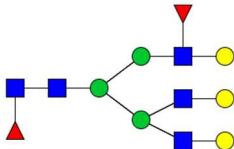   |
| 34 | 2908.6 |    |
| 35 | 2966.5 |    |
| 36 | 3082.6 |  |
| 37 | 3112.6 |  |
| 38 | 3215.5 |  |

|    |        |                                                                                     |
|----|--------|-------------------------------------------------------------------------------------|
| 39 | 3286.5 | 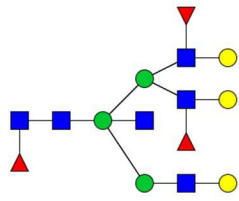   |
| 40 | 3460.7 |    |
| 41 | 3490.7 |    |
| 42 | 3735.9 |   |
| 43 | 3910.1 |  |
| 44 | 4084.1 |  |

**Supporting Table 2:** The identified N-glycans from two different murine bladder tissue samples processed and analyzed using SRS and MALDI-MS. All peaks were assigned a putative topology based on their *m/z* values and N-glycosylation biosynthetic pathway. Further structural details, such as inter-residue linkage, anomericity, and branching pattern, were not determined. ( ■ N-acetyl glucosamine; ● mannose; ● galactose; ▲ fucose; ◆ N-acetylneuraminic acid (Neu5Ac); ◇ N-Glycolylneuraminic acid (Neu5Gc))

| Glycan# | Observed <i>m/z</i> | Putative Topology                                                                   |
|---------|---------------------|-------------------------------------------------------------------------------------|
| 1       | 1579.8              | 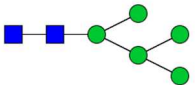   |
| 2       | 1590.8              |    |
| 3       | 1662.0              |   |
| 4       | 1783.9              |  |
| 5       | 1835.9              |  |
| 6       | 1866.0              |  |

|    |        |                                                                                     |
|----|--------|-------------------------------------------------------------------------------------|
| 7  | 1907.0 | 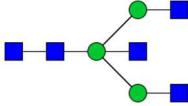   |
| 8  | 1988.0 |    |
| 9  | 2040.1 |    |
| 10 | 2070.0 |   |
| 11 | 2081.3 |  |
| 12 | 2111.2 |  |
| 13 | 2192.1 |  |

|    |        |                                                                                     |
|----|--------|-------------------------------------------------------------------------------------|
| 14 | 2244.1 | 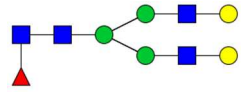   |
| 15 | 2285.2 |    |
| 16 | 2315.2 |    |
| 17 | 2396.2 |   |
| 18 | 2431.3 |  |
| 19 | 2461.3 |  |

|    |        |  |
|----|--------|--|
| 20 | 2489.3 |  |
| 21 | 2605.3 |  |
| 22 | 2635.4 |  |
| 23 | 2852.4 |  |
| 24 | 2966.5 |  |
| 25 | 2996.5 |  |

|    |        |  |
|----|--------|--|
| 26 | 3026.5 |  |
| 27 | 3084.6 |  |

**Supporting Table 3:** Protein and tryptic peptide yield from the SRS platform for various biologic samples. Protein concentration was measured in triplicate using the BCA assay. The concentrations of peptides were estimated based on an in-house peptide concentration standard curve (A205 - Nanodrop spectrophotometer, Thermo Fisher Scientific).

| <b>Sample Types (ug)</b>        | <b>Starting</b> | <b>Bound</b> | <b>Stripped proteins</b> | <b>Extracted peptides</b> | <b>Recovery yield (%)</b> |
|---------------------------------|-----------------|--------------|--------------------------|---------------------------|---------------------------|
| Fetuin (A)                      | 300             | 266          | 258                      | N/A                       | 97                        |
| Fetuin (B)                      | 300             | 289          | 251                      | N/A                       | 87                        |
| Fetuin (C)                      | 300             | 265          | N/A                      | 248                       | 94                        |
| Fetuin (D)                      | 300             | 272          | N/A                      | 251                       | 92                        |
| Serum IgG (A)                   | 300             | 282          | 264                      | N/A                       | 94                        |
| Serum IgG (B)                   | 300             | 284          | 272                      | N/A                       | 97                        |
| Membrane-enriched DU145Ctrl (A) | 400             | 365          | N/A                      | 321                       | 88                        |
| Membrane-enriched DU145Ctrl (B) | 400             | 363          | N/A                      | 315                       | 87                        |
| Membrane-enriched DU145KD (A)   | 400             | 352          | N/A                      | 310                       | 88                        |
| Membrane-enriched DU145KD (B)   | 400             | 359          | N/A                      | 309                       | 86                        |



**Supporting Table 4:** The tryptic peptides identified from SRS-bound bovine fetuin using LC-MS/MS. The charge states of observed peptides are annotated in parentheses. Three de-N-glycosylated motifs were located within three tryptic peptides of 72-103 (NCS), 145-159 (NDS) and 160-187 (NGS). The majority of known tryptic peptides were detected, with the exception of several that were too small or too large, and not identified because of MS limitations.

| AA Positions | Peptide sequence                                                     | Calc. [M+H] <sup>+</sup> | Rep.#1        | Rep.#2        |
|--------------|----------------------------------------------------------------------|--------------------------|---------------|---------------|
| 19-28        | IPLDPVAGYK                                                           | 1072.6037                | 536.8057 (2)  | 536.8055 (2)  |
| 29-50        | EPACDDPDTEQAALAAVDYINK                                               | 2406.0557                | 1203.5417 (2) | 1203.5410 (2) |
| 51-54        | HLPR                                                                 | 522.3152                 | 261.6598 (2)  | 261.6598 (2)  |
| 55-57        | GYK                                                                  | 367.1982                 | N/A           | N/A           |
| 58-67        | HTLNQIDSVK                                                           | 1154.617                 | 557.8101 (2)  | 557.8100 (2)  |
| 68-71        | VWPR                                                                 | 557.32                   | N/A           | N/A           |
| 72-103       | RPTGEVYDIEIDTLETTCHVLDPT<br>PLAN <u>C</u> SVR                        | 3672.7097                | 1224.9082 (3) | 1224.9082 (3) |
| 104-120      | QQTQHAVEGDCDIHVLK                                                    | 1977.9238                | 659.9838 (3)  | 659.9812 (3)  |
| 121-131      | QDGQFSVLFTK                                                          | 1269.6479                | 635.3251 (2)  | 635.3242 (2)  |
| 132-143      | CDSSPDSAEDVR                                                         | 1337.5065                | 669.2568 (2)  | 669.2565 (2)  |
| 145-159      | LCPDCPLLAPL <u>NDS</u> R                                             | 1741.7824                | 871.4134 (2)  | 871.4102 (2)  |
| 160-187      | VVHAVEVALATFNAES <u>NGSL</u> QLV<br>EISR                             | 3017.5584                | 1509.2840 (2) | 1509.2826 (2) |
| 188-211      | AQFVPLPVSVSVEFAVAATDCIAK                                             | 2519.3005                | N/A           | N/A           |
| 212-218      | EVVDPTK                                                              | 787.4202                 | 394.2115 (2)  | 394.2140 (2)  |
| 219-225      | CNLLAEK                                                              | 847.4132                 | 424.2198 (2)  | 424.2163 (2)  |
| 226-231      | QYGFCK                                                               | 802.3343                 | N/A           | N/A           |
| 232-237      | GSVIQK                                                               | 631.3779                 | 316.1905 (2)  | 316.1943 (2)  |
| 238-245      | ALGGEDVR                                                             | 816.4216                 | 408.7124 (2)  | 408.7145 (2)  |
| 246-306      | VTCTLFQTQPVIPQPQPDGA<br>EAEAPSAVPDAAGPTPSAAG<br>PPVASVVGPSVVAVPLPLHR | 6015.1116                | N/A           | N/A           |
| 307-312      | AHYDLR                                                               | 774.3899                 | 387.6964 (2)  | 387.6935 (2)  |
| 313-333      | HTFSGVASVESSSGEAFHVGK                                                | 2120.0049                | 707.3426 (3)  | 707.3418 (3)  |
| 334-348      | TPIVGQPSIPGGPVR                                                      | 1474.8382                | 737.9231 (2)  | 737.9216 (2)  |
| 349-353      | LCPGR                                                                | 602.287                  | N/A           | N/A           |
| 354-355      | IR                                                                   | 288.2036                 | N/A           | N/A           |
| 356--359     | YFKI                                                                 | 570.3292                 | N/A           | N/A           |

**Supporting Table 5:** Proteomic and glycoproteomics results for different biological samples processed using SRS. Experimental and bioinformatics procedures are described in **Experimental section**.

| <b>Samples</b>                                   | <b>Proteins</b> | <b>Peptides</b> | <b>Deglycopeptides</b> | <b>Glycosites</b> | <b>Glycoproteins</b> |
|--------------------------------------------------|-----------------|-----------------|------------------------|-------------------|----------------------|
| DU145Ctrl<br>Membrane-enriched Rep#1             | 2114            | 19699           | 251                    | 260               | 145                  |
| DU145Ctrl<br>Membrane-enriched Rep#2             | 2255            | 21007           | 270                    | 275               | 155                  |
| DU145KD<br>Membrane-enriched Rep#1               | 2187            | 19475           | 263                    | 278               | 152                  |
| DU145KD<br>Membrane-enriched Rep#2               | 2146            | 19010           | 251                    | 264               | 145                  |
| DU145Ctrl<br>Membrane-enriched<br>Combined #1&#2 | 2386            | 23793           | 319                    | 322               | 179                  |
| DU145KD<br>Membrane-enriched<br>Combined #1&#2   | 2340            | 21799           | 308                    | 320               | 175                  |
| Mouse Colon<br>Membrane-enriched Rep#1           | 1747            | 14427           | 106                    | 108               | 76                   |
| Mouse Colon<br>Membrane-enriched Rep b#2         | 1717            | 14152           | 115                    | 118               | 78                   |
| Human Urine<br>Rep#1                             | 621             | 5396            | 455                    | 449               | 221                  |
| Human Urine<br>Rep#2                             | 574             | 5218            | 447                    | 439               | 206                  |

**Supporting Table 6:** N-glycans identified from DU145Ctrl and DU145KD cell lines processed and analyzed using SRS and MALDI-MS. All peaks were assigned a putative topology based on their *m/z* values and N-glycosylation biosynthetic pathway. Further structural details, such as inter-residue linkage, anomericity, and branching pattern, were not determined. [■ N-acetyl glucosamine; ● mannose; ● galactose; ▲ fucose; ◆ N-acetylneuraminic acid (Neu5Ac).]

| Glycan # | Observed <i>m/z</i> | Putative Glycan                                                                     |
|----------|---------------------|-------------------------------------------------------------------------------------|
| 1        | 1579.8              | 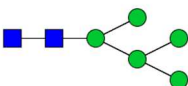   |
| 2        | 1590.8              |    |
| 3        | 1661.9              |   |
| 4        | 1621.0              |  |
| 5        | 1783.9              |  |
| 6        | 1835.9              |  |

|    |        |                                                                                     |
|----|--------|-------------------------------------------------------------------------------------|
| 7  | 1866.0 | 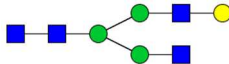   |
| 8  | 1988.0 |    |
| 9  | 2040.1 |    |
| 10 | 2070.0 |  |
| 11 | 2081.3 |  |
| 12 | 2192.1 |  |
| 13 | 2244.1 |  |

|    |        |                                                                                     |
|----|--------|-------------------------------------------------------------------------------------|
| 14 | 2396.2 | 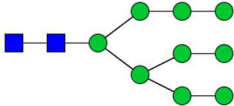   |
| 15 | 2431.2 |    |
| 16 | 2489.3 |    |
| 17 | 2519.6 |  |
| 18 | 2605.3 |  |
| 19 | 2635.3 |  |

|    |        |                                                                                     |
|----|--------|-------------------------------------------------------------------------------------|
| 20 | 2693.3 | 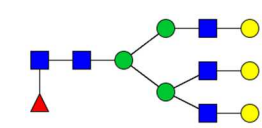   |
| 21 | 2792.4 |    |
| 22 | 2880.4 |    |
| 23 | 2966.5 |  |
| 24 | 3054.7 |  |
| 25 | 3142.8 |  |

|    |        |                                                                                     |
|----|--------|-------------------------------------------------------------------------------------|
| 26 | 3241.7 | 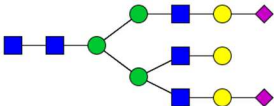   |
| 27 | 3329.8 |    |
| 28 | 3415.8 |    |
| 29 | 3503.9 |  |
| 30 | 3602.8 |  |
| 31 | 3690.9 |  |

|    |        |                                                                                     |
|----|--------|-------------------------------------------------------------------------------------|
| 32 | 3776.9 | 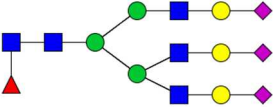   |
| 33 | 3865.1 |    |
| 34 | 3964.1 |    |
| 35 | 4226.1 |  |
| 36 | 4587.3 |  |

1. Zhou, H., Froehlich, J.W., Briscoe, A.C. & Lee, R.S. *Mol Cell Proteomics* **12**, 2981-2991 (2013).
